# Supplementary material for: Effect of Magnesium Ion on the Radical-Scavenging Rate of Pterostilbene in an Aprotic Medium: Mechanistic Insight into the Antioxidative Reaction of Pterostilbene
Source: MDPI journal article supplement (doi:10.3390/antiox11020340), 2022-02-09
Supplement: s1 [file s1]

## Coordinates

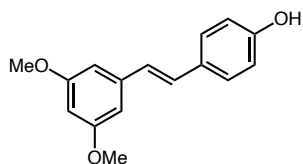

M06-2X/6-31++G(d) level with C-PCM = acetonitrile

Charge = 0

Spin: Singlet

| Center<br>Number | Atomic<br>Number | Atomic<br>Type | Coordinates (Angstroms) |           |           |
|------------------|------------------|----------------|-------------------------|-----------|-----------|
|                  |                  |                | X                       | Y         | Z         |
| 1                | 6                | 0              | -1.151004               | 0.433177  | -0.091654 |
| 2                | 6                | 0              | -0.177496               | -0.472734 | 0.101789  |
| 3                | 6                | 0              | 1.270488                | -0.204634 | 0.062899  |
| 4                | 6                | 0              | 2.136699                | -1.302796 | -0.024218 |
| 5                | 6                | 0              | 3.518769                | -1.092416 | -0.078723 |
| 6                | 6                | 0              | 4.038741                | 0.199368  | -0.042445 |
| 7                | 6                | 0              | 3.170342                | 1.288096  | 0.056889  |
| 8                | 6                | 0              | 1.788259                | 1.098212  | 0.113766  |
| 9                | 1                | 0              | 1.118032                | 1.942305  | 0.216310  |
| 10               | 1                | 0              | 1.719270                | -2.302720 | -0.055823 |
| 11               | 6                | 0              | -2.597780               | 0.178848  | -0.041318 |
| 12               | 6                | 0              | -3.153927               | -1.010796 | 0.454335  |
| 13               | 6                | 0              | -4.528651               | -1.213545 | 0.470737  |
| 14               | 6                | 0              | -5.384963               | -0.216100 | -0.005336 |
| 15               | 6                | 0              | -4.857505               | 0.980081  | -0.492848 |
| 16               | 6                | 0              | -3.480486               | 1.167628  | -0.504102 |
| 17               | 1                | 0              | -3.077437               | 2.102846  | -0.885607 |
| 18               | 1                | 0              | -2.510349               | -1.793059 | 0.846289  |
| 19               | 8                | 0              | -6.740753               | -0.353868 | -0.009687 |
| 20               | 1                | 0              | -6.992854               | -1.213839 | 0.361121  |
| 21               | 8                | 0              | 3.769051                | 2.509071  | 0.101523  |
| 22               | 8                | 0              | 4.434844                | -2.094090 | -0.165667 |
| 23               | 1                | 0              | -4.938947               | -2.141309 | 0.862026  |
| 24               | 1                | 0              | -5.532418               | 1.749306  | -0.855602 |
| 25               | 1                | 0              | 5.111466                | 0.358923  | -0.077990 |
| 26               | 1                | 0              | -0.880463               | 1.461152  | -0.331973 |
| 27               | 1                | 0              | -0.442841               | -1.513792 | 0.281868  |
| 28               | 6                | 0              | 3.958082                | -3.430678 | -0.194094 |
| 29               | 1                | 0              | 3.401236                | -3.668401 | 0.718687  |
| 30               | 1                | 0              | 3.322648                | -3.602722 | -1.069636 |
| 31               | 1                | 0              | 4.843673                | -4.062048 | -0.255776 |
| 32               | 6                | 0              | 2.938074                | 3.652782  | 0.225400  |
| 33               | 1                | 0              | 2.258682                | 3.738967  | -0.629630 |
| 34               | 1                | 0              | 2.359174                | 3.618708  | 1.154721  |
| 35               | 1                | 0              | 3.610121                | 4.509837  | 0.245208  |

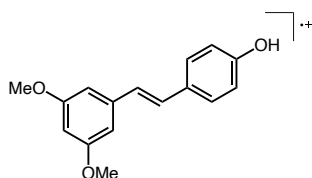

M06-2X/6-31++G(d) level with C-PCM = acetonitrile

Charge = 1

Spin: Doublet

| Center<br>Number | Atomic<br>Number | Atomic<br>Type | Coordinates (Angstroms) |           |           |
|------------------|------------------|----------------|-------------------------|-----------|-----------|
|                  |                  |                | X                       | Y         | Z         |
| 1                | 6                | 0              | 1.176929                | 0.453642  | -0.000399 |
| 2                | 6                | 0              | 0.164780                | -0.490548 | -0.000112 |
| 3                | 6                | 0              | -1.241166               | -0.207251 | -0.000060 |
| 4                | 6                | 0              | -2.117713               | -1.315001 | -0.000103 |
| 5                | 6                | 0              | -3.493345               | -1.098140 | -0.000058 |
| 6                | 6                | 0              | -3.992083               | 0.208422  | 0.000059  |
| 7                | 6                | 0              | -3.122092               | 1.307792  | 0.000143  |
| 8                | 6                | 0              | -1.746090               | 1.113336  | 0.000079  |
| 9                | 1                | 0              | -1.071853               | 1.958541  | 0.000179  |
| 10               | 1                | 0              | -1.701857               | -2.315555 | -0.000189 |
| 11               | 6                | 0              | 2.565009                | 0.175239  | -0.000253 |
| 12               | 6                | 0              | 3.110575                | -1.145133 | 0.000470  |
| 13               | 6                | 0              | 4.465454                | -1.347231 | 0.000646  |
| 14               | 6                | 0              | 5.337390                | -0.231316 | 0.000115  |
| 15               | 6                | 0              | 4.828356                | 1.087422  | -0.000616 |
| 16               | 6                | 0              | 3.472391                | 1.278265  | -0.000785 |
| 17               | 1                | 0              | 3.069053                | 2.286600  | -0.001341 |
| 18               | 1                | 0              | 2.455470                | -2.008810 | 0.000897  |
| 19               | 8                | 0              | 6.657184                | -0.361841 | 0.000274  |
| 20               | 1                | 0              | 6.931729                | -1.295549 | 0.000798  |
| 21               | 8                | 0              | -3.722900               | 2.517980  | 0.000298  |
| 22               | 8                | 0              | -4.423292               | -2.077636 | -0.000112 |
| 23               | 1                | 0              | 4.877333                | -2.351857 | 0.001212  |
| 24               | 1                | 0              | 5.525438                | 1.918186  | -0.001025 |
| 25               | 1                | 0              | -5.064738               | 0.374705  | 0.000108  |
| 26               | 1                | 0              | 0.909608                | 1.507310  | -0.000780 |
| 27               | 1                | 0              | 0.429299                | -1.544756 | 0.000066  |
| 28               | 6                | 0              | -3.968700               | -3.425673 | -0.000231 |
| 29               | 1                | 0              | -3.377037               | -3.635960 | -0.897177 |
| 30               | 1                | 0              | -3.376987               | -3.636104 | 0.896647  |
| 31               | 1                | 0              | -4.866621               | -4.041077 | -0.000255 |
| 32               | 6                | 0              | -2.893428               | 3.674004  | 0.000413  |
| 33               | 1                | 0              | -2.266282               | 3.701847  | 0.897506  |
| 34               | 1                | 0              | -2.266311               | 3.702046  | -0.896694 |
| 35               | 1                | 0              | -3.571774               | 4.525425  | 0.000518  |

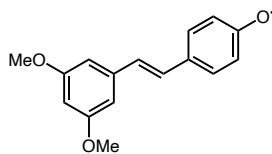

M06-2X/6-31++G(d) level with C-PCM = acetonitrile

Charge = 0

Spin: Doublet

| Center<br>Number | Atomic<br>Number | Atomic<br>Type | Coordinates (Angstroms) |           |           |
|------------------|------------------|----------------|-------------------------|-----------|-----------|
|                  |                  |                | X                       | Y         | Z         |
| 1                | 6                | 0              | 1.227862                | 0.442953  | 0.000156  |
| 2                | 6                | 0              | 0.228429                | -0.482777 | -0.000027 |
| 3                | 6                | 0              | -1.205063               | -0.201605 | -0.000036 |
| 4                | 6                | 0              | -2.077921               | -1.301113 | 0.000043  |
| 5                | 6                | 0              | -3.459316               | -1.086089 | 0.000036  |
| 6                | 6                | 0              | -3.968418               | 0.211106  | -0.000055 |
| 7                | 6                | 0              | -3.094885               | 1.301918  | -0.000142 |
| 8                | 6                | 0              | -1.713890               | 1.108384  | -0.000141 |
| 9                | 1                | 0              | -1.041157               | 1.955497  | -0.000256 |
| 10               | 1                | 0              | -1.664731               | -2.303143 | 0.000134  |
| 11               | 6                | 0              | 2.634064                | 0.162232  | 0.000093  |
| 12               | 6                | 0              | 3.177985                | -1.162462 | -0.000212 |
| 13               | 6                | 0              | 4.524136                | -1.372837 | -0.000285 |
| 14               | 6                | 0              | 5.468191                | -0.261341 | -0.000069 |
| 15               | 6                | 0              | 4.897239                | 1.077498  | 0.000239  |
| 16               | 6                | 0              | 3.545458                | 1.263136  | 0.000316  |
| 17               | 1                | 0              | 3.135205                | 2.270136  | 0.000550  |
| 18               | 1                | 0              | 2.509605                | -2.017558 | -0.000386 |
| 19               | 8                | 0              | 6.701935                | -0.451326 | -0.000142 |
| 20               | 8                | 0              | -3.689268               | 2.523075  | -0.000264 |
| 21               | 8                | 0              | -4.382720               | -2.081531 | 0.000157  |
| 22               | 1                | 0              | 4.938809                | -2.376685 | -0.000516 |
| 23               | 1                | 0              | 5.586215                | 1.916924  | 0.000404  |
| 24               | 1                | 0              | -5.041010               | 0.375451  | -0.000054 |
| 25               | 1                | 0              | 0.969630                | 1.499897  | 0.000368  |
| 26               | 1                | 0              | 0.483990                | -1.540092 | -0.000173 |
| 27               | 6                | 0              | -3.914772               | -3.422671 | -0.000025 |
| 28               | 1                | 0              | -3.320074               | -3.629775 | -0.896052 |
| 29               | 1                | 0              | -3.320065               | -3.630025 | 0.895938  |
| 30               | 1                | 0              | -4.805678               | -4.048992 | -0.000101 |
| 31               | 6                | 0              | -2.852490               | 3.671046  | 0.000264  |
| 32               | 1                | 0              | -2.223457               | 3.696363  | 0.896406  |
| 33               | 1                | 0              | -2.223224               | 3.697030  | -0.895696 |
| 34               | 1                | 0              | -3.523285               | 4.528958  | 0.000480  |

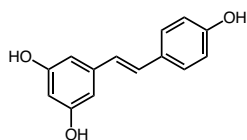

M06-2X/6-31++G(d) level with C-PCM = acetonitrile

Charge = 0

Spin: Singlet

| Center<br>Number | Atomic<br>Number | Atomic<br>Type | Coordinates (Angstroms) |           |           |
|------------------|------------------|----------------|-------------------------|-----------|-----------|
|                  |                  |                | X                       | Y         | Z         |
| 1                | 6                | 0              | 0.693910                | 0.460764  | 0.033887  |
| 2                | 6                | 0              | -0.270347               | -0.472985 | -0.029793 |
| 3                | 6                | 0              | -1.720708               | -0.219971 | -0.021335 |
| 4                | 6                | 0              | -2.579176               | -1.322333 | 0.076920  |
| 5                | 6                | 0              | -3.962226               | -1.132654 | 0.093004  |
| 6                | 6                | 0              | -4.510851               | 0.143236  | 0.011848  |
| 7                | 6                | 0              | -3.648983               | 1.235363  | -0.090600 |
| 8                | 6                | 0              | -2.266184               | 1.069423  | -0.110919 |
| 9                | 1                | 0              | -1.627053               | 1.942516  | -0.206854 |
| 10               | 1                | 0              | -2.168008               | -2.326968 | 0.142736  |
| 11               | 6                | 0              | 2.143693                | 0.222967  | 0.011456  |
| 12               | 6                | 0              | 2.719200                | -1.030990 | -0.247742 |
| 13               | 6                | 0              | 4.097618                | -1.206238 | -0.248477 |
| 14               | 6                | 0              | 4.938125                | -0.117891 | 0.004854  |
| 15               | 6                | 0              | 4.391231                | 1.140752  | 0.255699  |
| 16               | 6                | 0              | 3.010745                | 1.299795  | 0.255296  |
| 17               | 1                | 0              | 2.591425                | 2.284149  | 0.450059  |
| 18               | 1                | 0              | 2.089460                | -1.889536 | -0.462221 |
| 19               | 8                | 0              | 6.296188                | -0.226669 | 0.013498  |
| 20               | 1                | 0              | 6.562689                | -1.140496 | -0.172656 |
| 21               | 8                | 0              | -4.231643               | 2.465424  | -0.175942 |
| 22               | 8                | 0              | -4.836036               | -2.174989 | 0.188494  |
| 23               | 1                | 0              | 4.523834                | -2.185729 | -0.452113 |
| 24               | 1                | 0              | 5.053704                | 1.979388  | 0.447356  |
| 25               | 1                | 0              | -5.586062               | 0.287129  | 0.022730  |
| 26               | 1                | 0              | 0.412632                | 1.509699  | 0.123432  |
| 27               | 1                | 0              | 0.004649                | -1.525660 | -0.079781 |
| 28               | 1                | 0              | -3.549940               | 3.153214  | -0.228632 |
| 29               | 1                | 0              | -4.351674               | -3.013270 | 0.242965  |

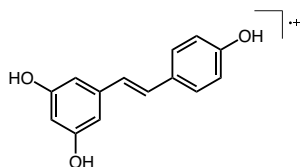

M06-2X/6-31++G(d) level with C-PCM = acetonitrile

Charge = 1

Spin: Doublet

| Center<br>Number | Atomic<br>Number | Atomic<br>Type | Coordinates (Angstroms) |           |           |
|------------------|------------------|----------------|-------------------------|-----------|-----------|
|                  |                  |                | X                       | Y         | Z         |
| 1                | 6                | 0              | -0.718742               | 0.486819  | 0.000006  |
| 2                | 6                | 0              | 0.274057                | -0.476667 | -0.000101 |
| 3                | 6                | 0              | 1.687212                | -0.219535 | -0.000082 |
| 4                | 6                | 0              | 2.545991                | -1.338386 | -0.000041 |
| 5                | 6                | 0              | 3.923524                | -1.147632 | 0.000030  |
| 6                | 6                | 0              | 4.456142                | 0.142705  | 0.000061  |
| 7                | 6                | 0              | 3.601513                | 1.251024  | 0.000008  |
| 8                | 6                | 0              | 2.223462                | 1.086527  | -0.000074 |
| 9                | 1                | 0              | 1.581093                | 1.960377  | -0.000145 |
| 10               | 1                | 0              | 2.129002                | -2.341694 | -0.000052 |
| 11               | 6                | 0              | -2.110828               | 0.232137  | 0.000013  |
| 12               | 6                | 0              | -2.677818               | -1.080391 | -0.000054 |
| 13               | 6                | 0              | -4.034846               | -1.260453 | -0.000062 |
| 14               | 6                | 0              | -4.889043               | -0.129649 | -0.000002 |
| 15               | 6                | 0              | -4.358762               | 1.181835  | 0.000077  |
| 16               | 6                | 0              | -3.000612               | 1.350556  | 0.000089  |
| 17               | 1                | 0              | -2.580674               | 2.352060  | 0.000150  |
| 18               | 1                | 0              | -2.036557               | -1.954278 | -0.000096 |
| 19               | 8                | 0              | -6.209051               | -0.239480 | -0.000006 |
| 20               | 1                | 0              | -6.499058               | -1.168798 | -0.000055 |
| 21               | 8                | 0              | 4.197774                | 2.468617  | 0.000019  |
| 22               | 8                | 0              | 4.812280                | -2.170767 | 0.000082  |
| 23               | 1                | 0              | -4.463730               | -2.257854 | -0.000113 |
| 24               | 1                | 0              | -5.042552               | 2.023464  | 0.000128  |
| 25               | 1                | 0              | 5.531611                | 0.287975  | 0.000127  |
| 26               | 1                | 0              | -0.430986               | 1.535053  | 0.000094  |
| 27               | 1                | 0              | -0.009668               | -1.525736 | -0.000188 |
| 28               | 1                | 0              | 3.532444                | 3.174876  | 0.000148  |
| 29               | 1                | 0              | 4.353553                | -3.025756 | 0.000025  |

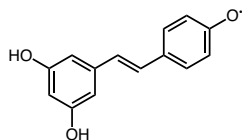

M06-2X/6-31++G(d) level with C-PCM = acetonitrile

Charge = 0

Spin: Doublet

| Center<br>Number | Atomic<br>Number | Atomic<br>Type | Coordinates (Angstroms) |           |           |
|------------------|------------------|----------------|-------------------------|-----------|-----------|
|                  |                  |                | X                       | Y         | Z         |
| 1                | 6                | 0              | 0.770367                | 0.472961  | 0.000052  |
| 2                | 6                | 0              | -0.209674               | -0.471572 | -0.000015 |
| 3                | 6                | 0              | -1.648060               | -0.215307 | -0.000013 |
| 4                | 6                | 0              | -2.506709               | -1.324619 | 0.000030  |
| 5                | 6                | 0              | -3.888748               | -1.133793 | 0.000042  |
| 6                | 6                | 0              | -4.430681               | 0.148243  | 0.000011  |
| 7                | 6                | 0              | -3.569723               | 1.246929  | -0.000038 |
| 8                | 6                | 0              | -2.187764               | 1.081391  | -0.000053 |
| 9                | 1                | 0              | -1.547291               | 1.957799  | -0.000104 |
| 10               | 1                | 0              | -2.095397               | -2.330997 | 0.000056  |
| 11               | 6                | 0              | 2.182350                | 0.218180  | 0.000030  |
| 12               | 6                | 0              | 2.748664                | -1.096839 | -0.000074 |
| 13               | 6                | 0              | 4.098276                | -1.283631 | -0.000104 |
| 14               | 6                | 0              | 5.022436                | -0.155532 | -0.000049 |
| 15               | 6                | 0              | 4.428256                | 1.173306  | 0.000087  |
| 16               | 6                | 0              | 3.073330                | 1.335222  | 0.000117  |
| 17               | 1                | 0              | 2.645538                | 2.334891  | 0.000209  |
| 18               | 1                | 0              | 2.095049                | -1.963277 | -0.000130 |
| 19               | 8                | 0              | 6.259238                | -0.323796 | -0.000038 |
| 20               | 8                | 0              | -4.154311               | 2.476579  | -0.000080 |
| 21               | 8                | 0              | -4.768221               | -2.172562 | 0.000084  |
| 22               | 1                | 0              | 4.530609                | -2.280041 | -0.000181 |
| 23               | 1                | 0              | 5.102508                | 2.024552  | 0.000157  |
| 24               | 1                | 0              | -5.505875               | 0.293116  | 0.000022  |
| 25               | 1                | 0              | 0.491551                | 1.524745  | 0.000127  |
| 26               | 1                | 0              | 0.064403                | -1.524224 | -0.000070 |
| 27               | 1                | 0              | -3.476014               | 3.169846  | -0.000073 |
| 28               | 1                | 0              | -4.292652               | -3.017821 | 0.000133  |

Total Energies (in hartree) of RSV and PTS

| Compound | Neutral      | Radical Cation | Phenoxyl Radical |
|----------|--------------|----------------|------------------|
| RSV      | −766.0912804 | −765.8787068   | −765.4564117     |
| PTS      | −844.6537267 | −844.4425055   | −844.0191963     |
